# Supplementary material for: Mechanistic insights for regulating the site occupancy, valence states and optical transitions of Mn ions in yttrium–aluminum garnets via codoping
Source: Royal Society of Chemistry journal article supplement (doi:10.1039/d3cp01548c), 2023-01-01
Supplement: d3cp01548c1.pdf [file d3cp01548c1.pdf]

# Electronic Supplementary Information for Mechanistic Insights on Regulating the Site Occupancy, Valence States and Optical Transitions of Mn Ions in Yttrium-Aluminum Garnet via Codoping

Qiaoling Chen,<sup>†,‡</sup> MingZhe Liu,<sup>†,‡</sup> Chonggeng Ma,<sup>¶</sup> and Chang-Kui Duan<sup>\*,†,‡</sup>

<sup>†</sup>*CAS Key Laboratory of Microscale Magnetic Resonance, and School of Physical Sciences,  
University of Science and Technology of China, Hefei 230026, China*

<sup>‡</sup>*CAS Center for Excellence in Quantum Information and Quantum Physics, University of  
Science and Technology of China, Hefei 230026, China*

<sup>¶</sup>*School of Optoelectronic Engineering & CQUPT-BUL Innovation Institute, Chongqing  
University of Posts and Telecommunications, Chongqing 400065, China*

E-mail: ckduan@ustc.edu.cn

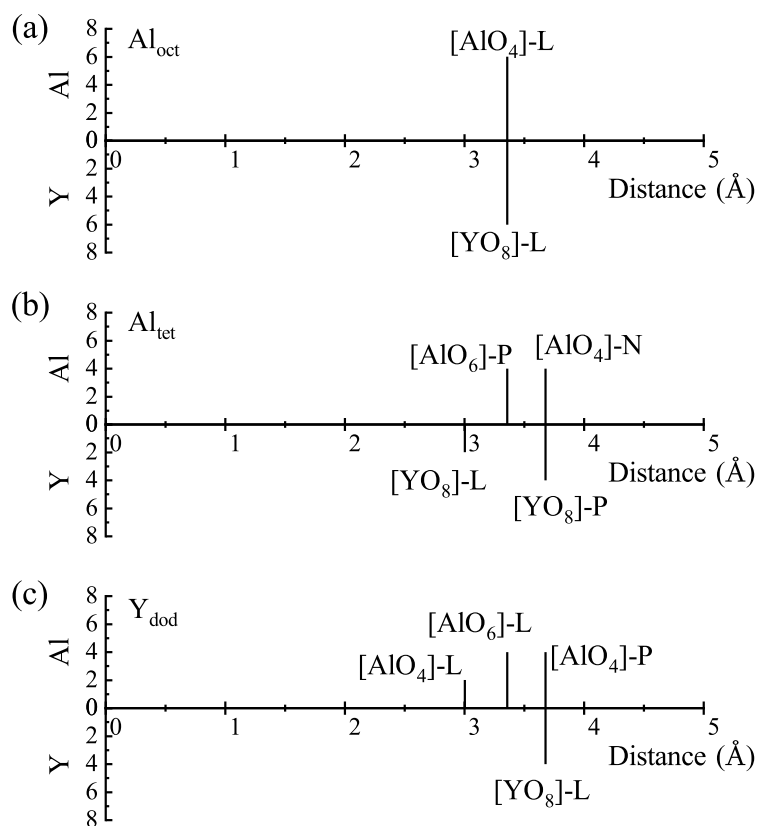

Figure S1: The numbers of near Al/Y ions of Al<sub>oct</sub> (a), Al<sub>tet</sub> (b) and Y<sub>dod</sub> (c) ions as the function of distance. The near Al/Y-O units and Al<sub>oct</sub>-O (a), Al<sub>tet</sub>-O (b) and Y<sub>dod</sub>-O (c) units are connected by the line (L), point (P) and no (N) sharing mode with two, one and no sharing oxygen ions, respectively.

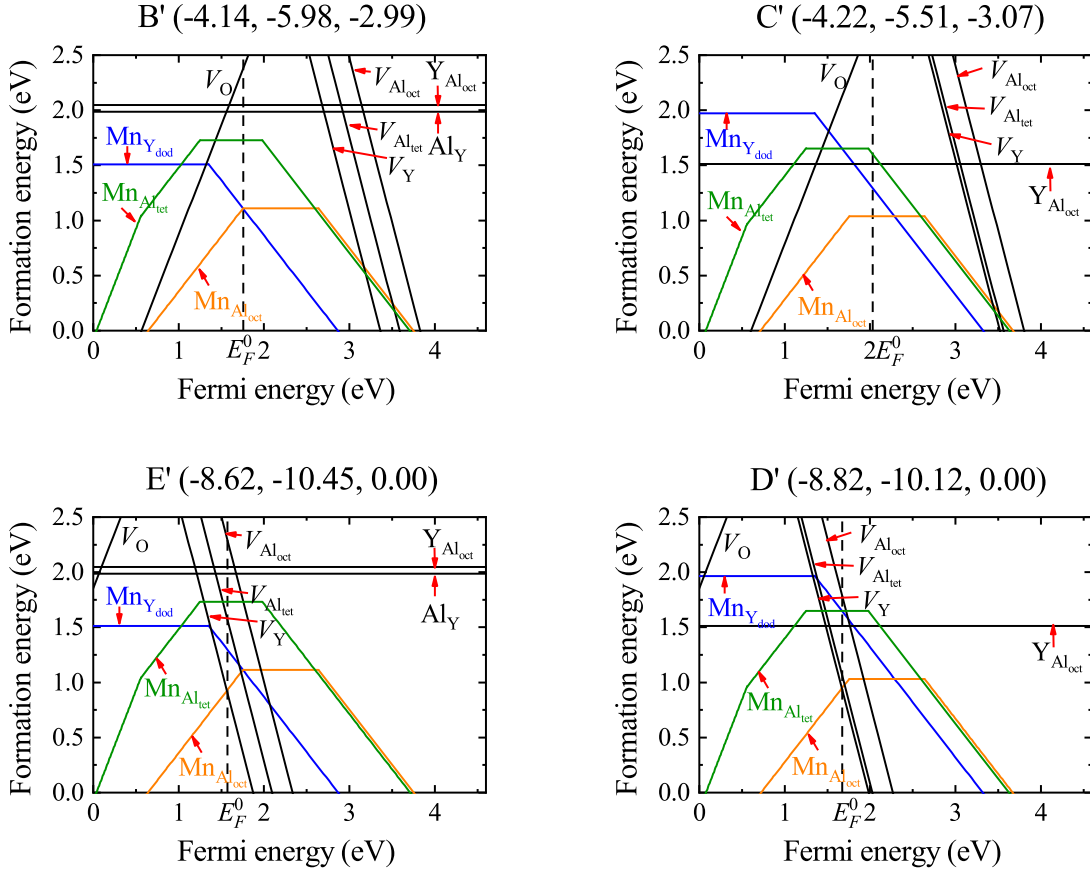

Figure S2: The formation energies of Mn dopant and intrinsic defects as a function of Fermi energy in the critical chemical potentials ( $\Delta\mu_{Al}$ ,  $\Delta\mu_Y$ ,  $\Delta\mu_O$ ) conditions of the B', C', D' and E' points in Figure 1 of main text. The vertical dashed lines are the equilibrium Fermi energies  $E_F^0$ .

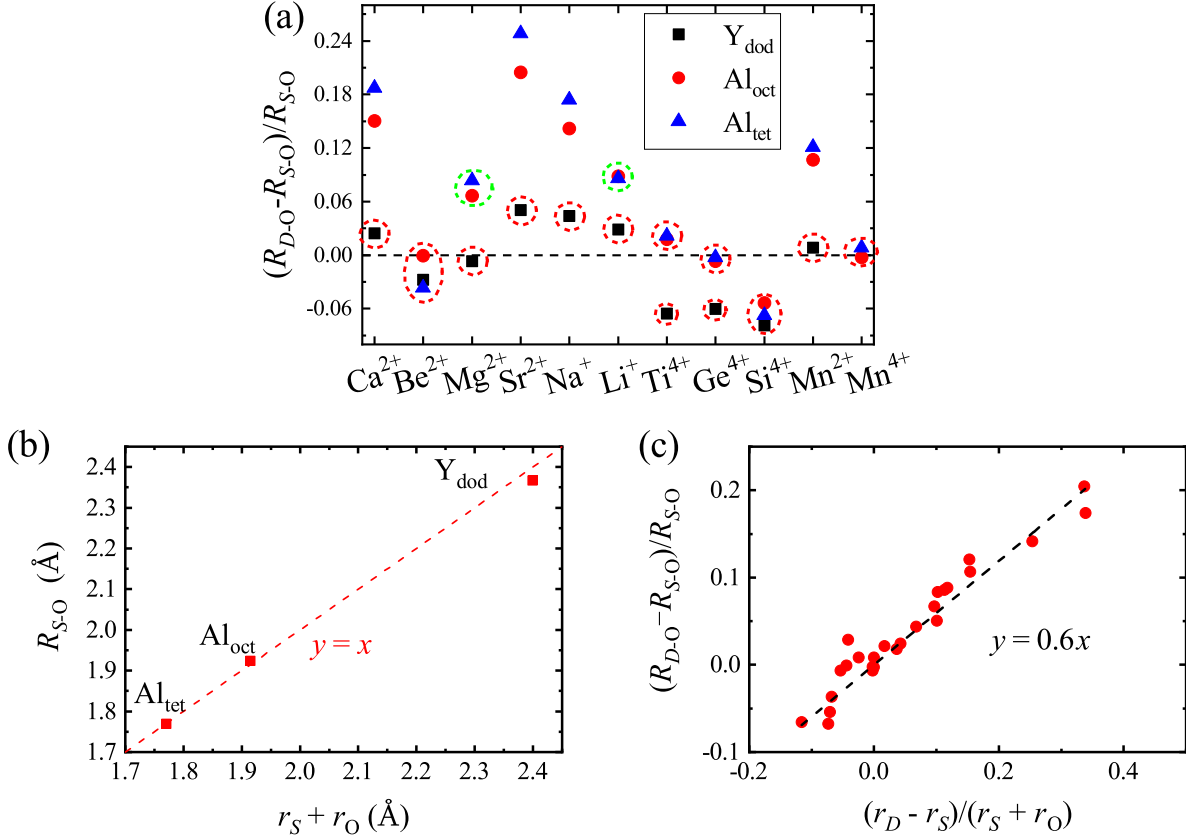

Figure S3: (a) The relative changes of calculated bond lengths with various cation substitutions, where  $R_{D-O}$  and  $R_{S-O}$  are the average bond length of the dopant and substituted ions with coordinated oxygen ions, respectively. Black square, red circle and blue triangle represent that substituted ions are  $Y_{\text{dod}}$ ,  $Al_{\text{oct}}$  and  $Al_{\text{tet}}$  ions, respectively. Red dotted circles are the cation substitutions of low defect formation energies. (b) The calculated bond length  $R_{S-O}$  vs the crystal ionic radii determined bond length  $r_S + r_O$  of the substituted ions ( $Al_{\text{tet}}$ ,  $Al_{\text{oct}}$  and  $Y_{\text{dod}}$ ) in YAG host. (c) The comparison of the relative changes of calculated bond lengths  $(R_{D-O} - R_{S-O})/R_{S-O}$  vs the relative mismatch of the crystal ionic radii  $(r_D - r_S)/(r_S + r_O)$  with various cation substitutions.
